# Supplementary material
Source: MDPI journal article supplement (https://www.mdpi.com/1424-8247/14/5/484)
Supplement: s1 [file s1]

# Supporting Information

## Human salivary histatin-1-functionalized Gelatin Methacrylate Hydrogels promotes the regeneration of cartilage and subchondral bone in temporomandibular joint

Changjing Shi <sup>1†</sup>, Yu Yao <sup>1†</sup>, Lei Wang<sup>2,3,4†</sup>, Ping Sun<sup>5</sup>, Jianying Feng <sup>1,\*</sup> and Gang Wu<sup>3,4\*</sup>

1 School of Stomatology, Zhejiang Chinese Medical University, Hangzhou Zhejiang 310053, China; 974876934@qq.com (C.J.S.); 3120374125@qq.com (Y.Y.)

2 Wenzhou Institute of Biomaterials & Engineering, University of Chinese Academy of Science, Wenzhou, Zhejiang 325027, China; wanglei20111213@163.com (L.W.)

3 Department of Oral and Maxillofacial Surgery/Pathology, Amsterdam UMC and Academic Center for Dentistry Amsterdam (ACTA), Vrije Universiteit Amsterdam (VU), Amsterdam Movement Science, Amsterdam, The Netherlands;

4 Department of Oral Implantology and Prosthetic Dentistry, Academic Centre for Dentistry Amsterdam (ACTA), University of Amsterdam (UvA) and Vrije Universiteit Amsterdam (VU), 1081 LA Amsterdam, Netherlands;

5 The Affiliated Hospital of Stomatology, School of Stomatology, Zhejiang University School of Medicine, and Key Laboratory of Oral Biomedical Research of Zhejiang Province, Hangzhou, Zhejiang, 310006, China. doc-torsp@163.com (P.S.)

† The authors contributed equally

\* Correspondence: twohorsejy@163.com; Tel.: +86 13093798116 (J.Y.F.); g.wu@acta.nl; Tel.: +31 20 5980866 (G.W.)

**Figure S1**

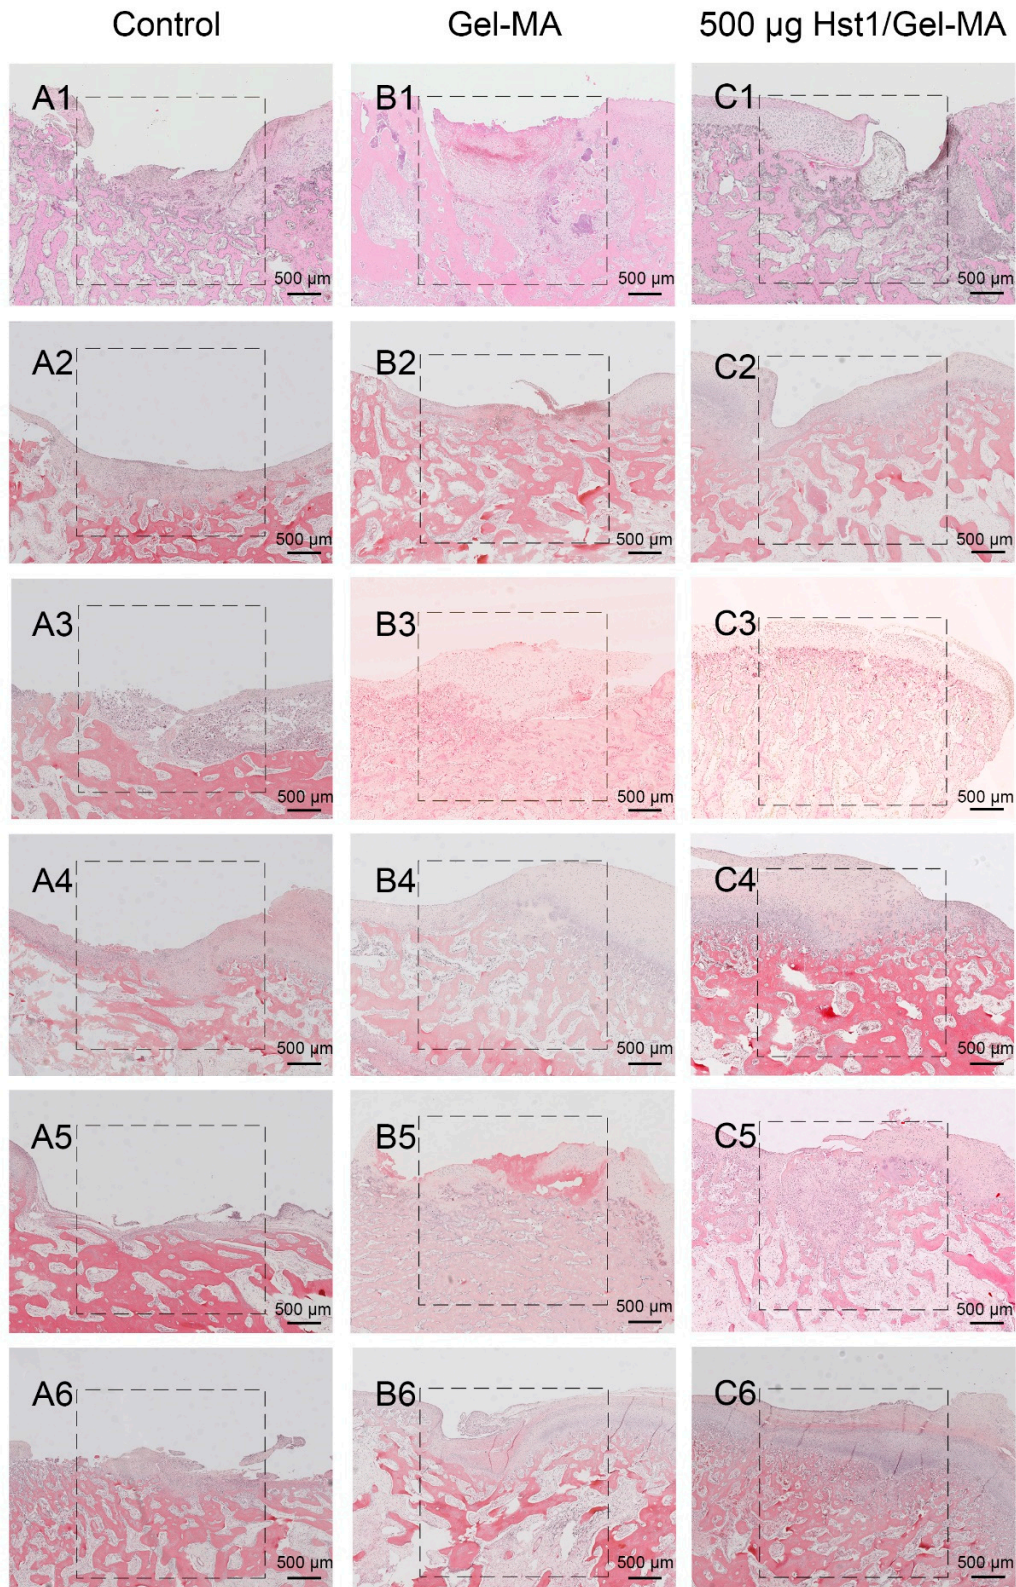

**Figure S1.** Light micrographs of H&E-stained tissue sections of rabbit condyles with critical-size (3 mm in diameter and 3 mm in depth) osteochondral defects that were treated as control group (A1–A6), Gel-MA group (B1–B6) and Hst1/Gel-MA group (C1–C6). N = 6 animals per group. The tissues were retrieved at 4 weeks post operation and then subjected to histologic processing and sectioning. The dotted square area is the original defect area (3mm\*3mm). Scale bar = 500 µm.
